1 **The Broken Window: An algorithm for quantifying and characterizing**  
2 **misleading trajectories in ecological processes**

3

4 **Christie A. Bahlai<sup>1,2,\*</sup>, Easton R. White<sup>3,4</sup>, Julia D. Perrone<sup>1,5</sup>, Sarah Cusser<sup>2</sup> and Kaitlin Stack**  
5 **Whitney<sup>6</sup>**

6

7 1 Department of Biological Sciences and Environmental Science and Design Research Institute, Kent  
8 State University

9 2 Kellogg Biological Station Long Term Ecological Research Site, Michigan State University

10 3 Department of Biological Sciences, University of New Hampshire

11 4 Gund Institute for Environment, University of Vermont

12 5 School of Information, Kent State University

13 6 Science and Technology Studies Department, Rochester Institute of Technology

14 \* Corresponding author [cbahlai@kent.edu](mailto:cbahlai@kent.edu)

15

16

17 **Short title: An algorithm for quantifying and characterizing misleading trajectories**

18 **Abstract**

19 A core issue in temporal ecology is the concept of trajectory—that is, when can ecologists have  
20 reasonable assurance that they know where a system is going? In this paper, we describe a *non-random*  
21 *resampling* method to directly address the temporal aspects of scaling ecological observations by  
22 leveraging existing data. Findings from long-term research sites have been hugely influential in ecology  
23 because of their unprecedented longitudinal perspective, yet short-term studies more consistent with  
24 typical grant cycles and graduate programs are still the norm. We use long-term insights to create ‘broken  
25 windows,’ that is, reanalyze long-term studies from short-term observational perspectives to examine  
26 discontinuities in trends at differing temporal scales.

27 The broken window algorithm connects our observations between the short-term and the long-  
28 term with an automated, systematic resampling approach: in short, we repeatedly ‘sample’ moving  
29 windows of data from existing long-term time series, and analyze these sampled data as if they  
30 represented the entire dataset. We then compile typical statistics used to describe the relationship in the  
31 sampled data, through repeated samplings, and then use these derived data to gain insights to the  
32 questions: 1) *how often are the trends observed in short-term data misleading, and 2) can characteristics*  
33 *of these trends be used to predict our likelihood of being misled?* We develop a systematic resampling  
34 approach, the ‘broken\_window algorithm, and illustrate its utility with a case study of firefly observations  
35 produced at the Kellogg Biological Station Long-Term Ecological Research Site (KBS LTER). Through a  
36 variety of visualizations, summary statistics, and downstream analyses, we provide a standardized  
37 approach to evaluating the trajectory of a system, the amount of observation required to find a meaningful  
38 trajectory in similar systems, and a means of evaluating our confidence in our conclusions.

39 **Highlights**

- 40 Trends identified in short-term ecology studies can be misleading.
- 41 Non-random resampling can show how prone different systems are to misleading trends
- 42 The Broken Window algorithm is a new tool to help synthesize temporal data
- 43 This tool helps to understand how much data is needed for forecasting to be reliable
- 44 It can also be used to quantify how likely it is that an observed trend is spurious.

45 **KEYWORDS:** Population, time series, data mining, scaling, trajectory, firefly, lampyridae

46

47

## 48        **1 Introduction**

49            A fundamental problem in ecology is understanding how to scale discoveries: from patterns  
50 observed in the lab or the plot to the field or the region, or bridging between short-term observations to  
51 long term trends and trajectories (Chave, 2013; Levin, 1992; Schneider, 2001). While shorter-term studies  
52 (i.e. those where data collection occurs for less than ~5 years) that coincide with length of typical grant  
53 cycles and graduate programs are still the norm, these human constraints do not necessarily capture the  
54 ecological phenomena they seek to measure, particularly their temporal dependencies (Hastings, 2004;  
55 Wood et al., 2020). This unfortunate mismatch of scales has the potential to limit our understanding of  
56 ecological trajectories- that is, the direction a system is going through time, and can undermine our efforts  
57 towards a predictive ecology (Evans et al., 2012). Understanding where and how short term patterns fit  
58 into broader trajectories, and how to interpret short-term patterns in the context of a system's trajectory  
59 remains an open question (Wauchope et al., 2019; White, 2019). This is illustrated by the recent insect  
60 decline controversy, where several high profile papers have observed precipitous declines in insect  
61 populations have been subsequently shown to use inappropriate methods for synthesizing the data  
62 (Daskalova et al., 2021; Grames et al., 2019; D. L. Wagner, 2020). For example, it is inappropriate to  
63 simply combine multiple short term studies and extrapolate (e.g.: Sánchez-Bayo & Wyckhuys, 2019),  
64 particularly without explicitly considering the underlying temporal dependencies in the data (Didham et al.,  
65 2020).

66            However, simply recommending that scientists collect more data, for longer, is not necessarily  
67 practicable. While long term studies are hugely influential in ecology, they require long-term access to  
68 research resources and infrastructure and thus their unprecedented longitudinal perspective is not typical  
69 (Hughes et al., 2017). Furthermore, short-term studies, given their prevalence and more limited temporal  
70 commitments, can provide a more spatially distributed and potentially richer and more nuanced view into  
71 a specific phenomenon at a point in (or shorter period of) time. The key to meaningful synthesis of this  
72 vast resource of short-term studies is linking the two extremes of scale. Thus, long-term data, particularly  
73 those produced in networked, uniform approaches like those offered by the United States Long Term  
74 Ecological Research Network (LTER), present a fundamental opportunity to bridge short and long-term  
75 trends through data mining. With long term data, ecologists can systematically investigate the presence  
76 and prevalence of short-term trends and compare them to the long-term system trajectories these data  
77 document.

78            Ecological systems are inherently dynamic, and variations in the metrics humans collect about  
79 these systems can be driven by a variety of stochastic and deterministic processes, as well as by  
80 sampling error or other research-induced effects (Suding & Gross, 2006). Short-term dynamics observed  
81 in an ecological system are not always indicative of the long-term trajectory of that system (Carey &  
82 Cottingham, 2016), and furthermore, shorter observation periods can lead to spurious observations  
83 because of sampling error variance (Daskalova et al., 2021). In population processes, for example,

84 density-dependent deterministic mechanisms, combined with environmental perturbations, can produce  
85 highly variable population numbers over various time scales (Turchin, 2003). Decoupling these processes  
86 can reveal the skeleton of a deterministic process interacting with external forces (Bahlai & Zipkin, 2020).  
87 However, to disentangle these drivers from an empirical standpoint generally requires a substantial  
88 amount of data to be collected over time (Cusser et al., 2020; Higgins et al., 1997). Indeed, in a recent  
89 study, White (2019) found that 72% of vertebrate population monitoring programs required at least a  
90 decade of observation before the overall trajectory of the population could be detected statistically. A  
91 recent study of trends in water bird populations found that short term trends were generally reflective of  
92 longer-term patterns (Wauchope et al., 2019), but varied by the generation length of the organism under  
93 study. However, they found that, similar to the White (2019) study, greater than two decades of  
94 observations would be required to reliably detect a change of 1% per year. Conversely, a study of  
95 population viability modelling in snails determined that although longer time series were generally better  
96 for establishing the population's trajectory, diminishing returns in precision were observed after about 10-  
97 15 years of data were collected (Rueda-Cediel et al., 2015). It is unclear how these findings can be  
98 generalized across organisms with differing lifespans, reproductive strategies and life histories, or other  
99 environmental processes.

100         The question of trajectory over time is central in ecology, particularly as related to how ecological  
101 systems on which humans depend are responding to disturbance or will behave under future climate or  
102 environmental conditions (Sutherland et al., 2013). Trajectory is essential to our understanding of  
103 ecosystems, their management, and policy decisions, as we interact with our environment. Analytic  
104 approaches to time series data have long been a focal area of research in ecology, allowing practitioners  
105 to examine temporal dependencies in a variety of processes. The shape a time series takes can provide  
106 meaningful information about the properties of the system, the rules that govern its variability, and the  
107 trajectory that the system is taking (Esling & Agon, 2012). But when insufficient data exists to apply (or  
108 even select) an appropriate time-series approach, a scientist may resort to simpler statistical tools, such  
109 as linear models, to describe the patterns observed in the data through the study's window of  
110 observation. It is not uncommon for a shorter-duration multi-year ecological study to extrapolate from its  
111 data, using the trends observed within their sampling window to draw conclusions about a system's  
112 apparent trajectory. For example, a study of British ladybeetle communities concluded that native  
113 ladybeetle species were in decline, as was total ladybeetle abundance, following the introduction of an  
114 invasive species (Brown et al., 2011). Another found that the richness and abundance of seeds in a soil  
115 seed bank were in a recovery trajectory following a period of industrial pollution (M. Wagner et al., 2006).  
116 An adventive pest species was implicated in reducing carbon to nitrogen ratios, organic matter in soils of  
117 infested forests, thus substantially changing the ecosystem's function over time (Orwig et al., 2008).  
118 These examples, representing very different ecological domains, have a common element of a three-year  
119 study duration. Yet these inferences may be out of temporal sync with the processes they aim to  
120 understand (Birkhead, 2014).

121 A vexing problem arises when shorter term studies apply statistical tools at time scales that are  
122 not matched with the underlying processes to make inferences about trajectory: not only may spurious  
123 trends be observed, but because only a portion of the underlying process variability is captured, a higher  
124 degree of statistical confidence in the result will be found. For example, Bahlai and students examined a  
125 12-year time series of firefly captures from Michigan (Hermann et al., 2016). Concerns had been raised  
126 about the status of fireflies in eastern North America (Chow et al., 2014), however, for that population, the  
127 authors found no evidence of decline over the 12 years (**Fig. 1**): there was no linear relationship between  
128 average captures and year ( $p=0.71$ ,  $R^2=0.002$ ), and, indeed, there appeared to be evidence of a cyclical  
129 dynamic common to many populations near their carrying capacity (**Fig. 1A**). However, students  
130 remarked that if the study had been limited to, for example, the 4 years from 2005-2008 (**Fig. 1B**),  
131 dramatically different conclusions would have been made. A linear regression of these data would very  
132 likely have been interpreted as 'strong evidence' that a decline was occurring in this population (slope -  
133  $0.31\pm 0.05$ ,  $p=0.000003$ ,  $R^2=0.633$ ). Simply, with less data, we would have made the wrong conclusions,  
134 and we would have been very confident in our wrong answer. This connection between shorter  
135 observation periods and more pronounced patterns is supported by observations made in synthesis  
136 efforts: in a compilation of insect biodiversity studies, the shortest time series were more likely to show the  
137 most extreme trends (Daskalova et al., 2021).

138 It is because of this phenomenon of "highly-confident wrong answers" that long-term studies are  
139 so valued in the ecological community. Indeed, because biological systems are often defined by their  
140 variability, when studies are shown to be irreproducible, it is not necessarily due to poor research  
141 practice, but due to their inability to capture the full variability of the system within the limits of the study  
142 design (Jarvis & Williams, 2016; Voelkl & Würbel, 2016). Long-term ecological research provides insight  
143 into the inherent variability of natural systems (Lovett et al., 2007), and insights are thus often only  
144 apparent after many years of study (Knapp et al., 2012). Beyond this, there are many other inherent  
145 benefits to long-term studies. Long-term studies are disproportionately represented in policy reports and  
146 in the ecological literature: studies involving long term observations are cited more often than studies of  
147 shorter duration (Hughes et al., 2017). Furthermore, long-term observational studies provide important  
148 baseline data: as the world itself changes, these data provide insight into how ecosystems function,  
149 instead of studying phenomena after they happen (Franklin et al., 1990; Hastings, 2004; Magurran et al.,  
150 2010).

151 Although the importance of long-term studies is clear, empirical examinations of the converse are  
152 rare: just how frequently are scientists misled by short-term studies? Can knowledge generated by  
153 studying the relationship between short- and long-term studies to bridge the interpretations of short-term  
154 data to long-term processes? In this study, we describe a synthetic, computational approach to create a  
155 framework to address two hypotheses:

156 *Shorter observation periods will increase the likelihood of observing misleading trends*

157 Because exogenous forces are of greater influence at smaller spatial and temporal scales, we  
158 predict that short time periods will be more variable due to these processes, and conversely do  
159 not capture the full extent of natural variability (Lovett et al., 2007; Suding & Gross, 2006), so they  
160 are more likely to result in “highly-confident wrong answers.”

161 *Statistical metrics often used as a proxy for ‘confidence’ in short-term trends (such as the p-value) will not*  
162 *be associated with an increased likelihood of capturing a time period consistent with long-term trends.*

163 Following from the previous prediction, we predict that p-values will be inferior predictors of the  
164 ‘correctness’ of short-term trends in predicting longer term trajectory compared to other properties  
165 of the system. Better predictors may include statistical measures (slope, standard error), but  
166 trends are likely moderated by system specific predictors (e.g. site, data type).

167 The Broken Window Algorithm is a suite of tools which will allow ecologists to leverage existing  
168 data to make inferences about system behavior and data needs to characterize system trajectories using  
169 an automated, non-random resampling approach (White & Bahlai, 2020): in short, our algorithm  
170 repeatedly ‘samples’ sequential moving windows of data from existing long-term time series, and  
171 analyzes these sampled data as if they represented the entire dataset that is, using knowingly limited  
172 ‘windows’ of observation to determine how temporal dependencies in a time series affect the likelihood of  
173 a short time making a spurious conclusion about how a process varies in time. The tool then compiles  
174 typical statistics used to describe the relationships in the sampled data, through repeated samplings, and  
175 then use these derived data to gain insights to the questions, *how often are the trends observed in short-*  
176 *term data misleading, and can the characteristics of these trends be used to predict our likelihood of*  
177 *being misled?* Findings from this work will support the development of a deep understanding of temporal  
178 scaling in ecology, aiding in the interpretation of countless future short-term studies. Secondly, and more  
179 broadly, our findings have applicability across a variety of domains. Results from this approach will have  
180 the opportunity to guide science funding policy, experimental design and interpretation, and data  
181 archiving.

## 182 **2 Materials and Methods**

### 183 *2.1 Developing the ‘broken\_window’ analysis algorithm*

184 The broken\_window algorithm breaks a time series dataset into all possible sequential subsets  
185 and then fits a linear model to each of these subsets and compiles the resulting summary statistics,  
186 allowing a user to identify and quantify spurious trends within their data. The algorithm is implemented as  
187 a series of functions written in R. The algorithm requires a user-inputted two variable data frame with a  
188 regular measurement interval as the first variable, and a response variable as the second variable. For  
189 the purpose of this study, we assume a yearly measurement interval and some integrative response  
190 metric (captures of organisms per trap, average reading, total yield). Data are first subjected to a  
191 standardization function which converts the response metric to a unitless Z-score to normalize the data

192 and make it possible to compare datasets with responses of very different magnitudes, and to minimize  
193 the impact of measurement unit choice on the observed trends.

194

195 A function that fits a linear model to the data and computes an output vector with the number of  
196 observations, the number of years in the study, and particular summary statistics of interest, namely, the  
197 slope of the relationship between the response variable and time, the standard error of this relationship,  
198 p-values for each of these statistics, and then  $R^2$  and adjusted  $R^2$ . Although  $R^2$  and  $p$  are not measures of  
199 statistical confidence per se, they are often used by ecologists in this way (Nakagawa & Cuthill, 2007;  
200 Yoccoz, 1991), and thus can be used as a means to approximate ‘conclusions’ that a researcher might  
201 make of the data. We use this fitting function within a moving window function that takes a provided data  
202 frame and iterates through it at all possible subsets and intervals, feeding each interval to the fitting  
203 function described above, and compiling the fit statistics for each into a single object.

204

### 205 **3 Calculation**

206 The moving window function is defined as follows. Let  $D$  represent the complete dataset, with  $D_{t,r}$   
207 representing a single observations of time  $t$  and response  $r$ . Let  $Y = (y_1, y_2, \dots, y_n)$  represent the set of  
208 unique values of  $t$  for which observations are recorded, where  $n$  is the total number of unique values of  $t$ .  
209  $D$  is partitioned into sequential subsets of size  $S = (3, 4, \dots, n)$  to create windows  $w_{y,S}$  such that each  
210 window

$$211 \quad w_{i,j} \subset D = \{ D_{t,r} \mid Y_i \leq t \leq Y_{i+S_j}, \forall Y_{i+S_j} \leq y_n \}, \text{ and } w_{y1,n} = D$$

212

213 For each  $w_{i,j}$ , we apply the fitting function described above, and compile the resultant fit statistics for  
214 downstream analyses into a data frame. Then, we calculate several meta-statistics and produce  
215 visualizations of trends from the resultant data frame.

216

217 First, we defined the slope of the longest time series (i.e. the slope of the linear regression of the whole  
218 dataset,  $D$ ) as the proxy for the ‘true’ trajectory of the data (as it represents the best information  
219 available), along with the computed slope’s standard deviation and standard error of the mean as  
220 measures of the ‘true’ variability of the set. Meta-statistics are computed based on comparison to these  
221 ‘true’ statistics.

222

223 For all meta-statistics based on frequentist assumptions, we used a set of frequently used ‘significance’  
224 levels as defaults (i.e. an  $\alpha=0.05$  for line fit statistics) but also encoded the functions so that a user could  
225 change these default values easily through supplying a function with different arguments. For each  
226 relevant function, we allowed users to toggle via a function argument between these meta-statistics  
227 based on the full set of windows tested, or only on the set of windows with statistically significant results,  
228 as defined above.

229

230 We defined “stability time” as the number of time steps needed before a given proportion of slopes  
231 (default = 95%) observed in a window of that length are within a certain number of standard deviations  
232 (default = 1) of the true slope. These values were selected to mitigate the impact of outlying data and to  
233 reflect industry standards. We computed absolute range (minimum and maximum values) of slope across  
234 all windows, as well as relative range (minimum and maximum difference from the ‘true’ slope, computed  
235 as the slope( $w_{i,j}$ ) minus slope( $D$ )). We also created functions that computed the proportion of windows  
236 examining a dataset would produce particular results. The proportion of statistically significant slopes  
237 produced by a given  $D$  measure the probability that a randomly selected window of time would produce a  
238 ‘statistically significant’ result. We defined the ‘proportion wrong’ as the proportion of windows producing  
239 statistics that would lead to conclusions differing from those observed for the ‘true’ trend (i.e. if the true  
240 trend was a positive slope, all windows suggesting a negative or non-significant zero-magnitude slope  
241 were considered spurious, and so on). We provide functions to compute the proportion wrong for all  
242 windows in combination, for each window length, and in the set of windows with lengths less than stability  
243 time. In combination, these functions provide a standardized approach to asking the questions of how  
244 long a system must be observed to make consistent conclusions about its trajectory, and the likelihood of  
245 coming to misleading conclusions about a system if it is observed for less than that time period.

246

247 We created several visualization functions to enable a user to, for a given dataset  $D$ , quickly interpret  
248 trends based on these meta-statistics, and compare trends in outputs across multiple datasets. A pyramid  
249 plot (**Fig. 2A**) uses the data frame of summary statistics from the fits of all windows. It plots the computed  
250 slope for each window on the x axis and the length of the window on the y-axis, resulting in a triangular or  
251 funnel shaped cloud of points. By default, point size is scaled by the  $R^2$  of the response-by-time  
252 relationship within a given window and statistically significant points are demarcated by a circle, and non-  
253 significant points given by an ‘X’. All points are given with lines indicating their respective standard error.  
254 A vertical dashed line indicates the slope of the longest time series, and two dotted vertical lines are  
255 plotted at one standard deviation from this value, allowing a user to visually identify the stability time, that  
256 is, the length of time required for the majority of windows to produce slopes within a certain interval of the  
257 true slope.

258

259 The “wrongness” plot (**Fig. 2B**) examines the same data from a summarized perspective- it plots the  
260 average  $R^2$  value and proportion wrong on the y axis by number of years in a window on the x-axis,  
261 allowing a user to visualize the relationship between misleading results and the ‘confidence’ in them for a  
262 given  $D$ . Finally, the “broken stick” plot (**Fig. 3**) allows a user to visualize the raw time series from  $D$   
263 simultaneously with some of the results of the broken\_window algorithm. The z-scaled response metric  
264 (y-axis) is plotted by observation time (x-axis). The true slope of the entire dataset  $D$  is plotted as a solid  
265 black line. Then, best fit lines for each window of a user-specified length (default=3-time steps) are



266 plotted, allowing a user to visualize the variation in trend at different points in the time series. Statistically  
267 significant slopes are given by dashed red lines, non-significant slopes are indicated by dotted lines.  
268 Finally, we created a function which layers and animates broken stick plots to visualize how window  
269 slopes change given increasing window length.

270 The R script was developed in RStudio Version 1.2.5033 “Orange Blossom” running R 3.6.2 “Dark and  
271 Stormy Night.” The script, its development history and all code for case studies and figure generation, are  
272 available on GitHub at [https://github.com/cbahlai/broken\\_window](https://github.com/cbahlai/broken_window).

273

## 274 **4 Results**

275 We demonstrated the utility of the broken\_window algorithm using the firefly study which inspired  
276 its development (Hermann et al., 2016). These data on firefly (beetles in the family Lampyridae, with  
277 those captured primarily thought to belong to *Photinus pyralis*) captures on insect sticky traps were  
278 collected 2004-2015 across 10 plant communities in southwestern Michigan. Complete sampling design  
279 and treatments descriptions are provided in Hermann et al (2016). For the purpose of this demonstration,  
280 we used the data collected at the perennial early secessional community plots, where fireflies were  
281 relatively abundant and complete data were available. Data were subjected to cleaning and quality control  
282 using scripts developed by Hermann et al (2016), and then compiled into a metric of total captures per  
283 trap, by year (N=12) and replicate (N=6), for a total of 72 observations.

284 The broken\_window algorithm produced 55 unique windows (1 sequence of 12 years of data, 2  
285 sequences of 11 years of data, ... , 10 sequences of 3 years of data). The full 12 year, 72 observation  
286 dataset of the normalized response over time was found to have a non-significant slope ( $-0.01 \pm 0.03$ ,  
287  $p=0.70$ ) and low  $R^2$  value (0.002) suggesting there is unlikely to be a linear trend with time in these data  
288 (or, more specifically, we fail to reject the null hypothesis that there is no linear relationship between our  
289 response and time) (**Fig. 2A**). Values computed for the slopes across the various windows ranged  $\pm 1.2$   
290 units around the true slope. The algorithm found a stability time of 7 years, that is, once seven years of  
291 data were collected, slopes on >95% of windows tested from anytime in the study were within one  
292 standard deviation of the slope of the longest series. Overall, nearly half (27/55) of the windows tested  
293 found a statistically significant slope, and thus there was nearly a 50% chance a shorter sample leading  
294 to a misleading conclusion. Although misleading slopes combined with significant p-values occurred for  
295 window lengths longer than 7 years (**Fig. 2B**), they were much more common with window lengths shorter  
296 than the stability time (68% of windows), yet these shorter windows were also more likely to be  
297 accompanied by a  $R^2 > 0.1$  (**Fig. 2B**). Although 3 of these 21 windows  $\geq 7$  years in length contained  
298 statistically significant trends, after stability time, relative slope ranged from -0.14 to 0.17 z-scaled units  
299 around the true slope (**Fig. 3**).

300

## 301 **5 Discussion**

302           Patterns observed in local scale, short-term ecology tend to be dominated by stochastic forces,  
303 making generalizations, extrapolations and predictions difficult at larger scales, yet are essential to  
304 capture fine-scale understanding of system dynamics (Chave, 2013; Willis & Birks, 2006). The  
305 broken\_window algorithm formalizes a framework for determining how long a system must be observed  
306 before conclusions about its general trends can be reached, and the prevalence of misleading results that  
307 occur prior to that time period. With our firefly case study, we found that trends observed prior to our  
308 ‘stability time’ of seven years had essentially even odds of being misleading: of three possible outcomes  
309 for each window (slope more negative than overall trend, slope more positive than overall trend, slope the  
310 same as overall trend), 2/3 of outcomes fell into the two former, and erroneous categories. In this case,  
311 no net linear trend was observed in the firefly population data (**Fig. 1, 2A**). Interestingly, we observed that  
312 in our case study, statistics commonly used as indicators of “strength” of relationship suggested more  
313 uncertainty, and less ‘confidence’ in results from windows of longer length: p-values, on average, went  
314 up, and  $R^2$  values decreased on average as longer windows of the time series were examined (**Fig. 2C**).  
315 This finding shines an important light on the reliability of these statistical tools as indicators of model  
316 performance: although they provide measures of how well the data from a given window fit the selected  
317 model at that time, they also inflate our confidence in what is often an inappropriate model fit to a  
318 spurious or short-term trend (Nakagawa & Cuthill, 2007). Given the high likelihood that these  
319 observations will vary by context, future work must consider how process characteristics, data availability,  
320 and cultural precedent (i.e.: the history of use of a given approach in a scientific field) affect the selection  
321 and interpretation of these models. Furthermore, it should explicitly examine data with different structures  
322 to examine the relationship between time series shape and likelihood of erroneous conclusions at  
323 differing study lengths.

324           In this paper, we demonstrate the utility of the broken\_window algorithm in the context of a  
325 simple, single population case study. However, this analytical approach has broad application which has  
326 been applied by several colleagues in additional systems. In a recent study, Cusser et al (2020) applied  
327 the algorithm to a thirty-year experiment comparing the sustainability and productivity attributes of an  
328 agricultural cropping system under several management regimes. In this system, due to high variability  
329 between treatments, 15 year observation periods were needed to detect consistent between-treatment  
330 differences in yield and soil water availability, and at least 1/5 of all windows examined resulted in  
331 spurious, statistically misleading trends (i.e. suggest the opposite relationship between management  
332 treatments). In an expansion of this work, Cusser and colleagues (2021) used the broken window  
333 algorithm to mine more than 100 additional long-term population datasets and found that ~50% of studies  
334 had temporal dependencies between treatments that could not be reliably detected with fewer than 10  
335 years of data. Furthermore, they linked the stability of the abiotic environment to the ability to detect  
336 trends: simply, experiments taking place in more variable environments were more prone to spurious  
337 trends and required more data and time to establish experimental differences. In another study, R.  
338 Christie et al (2021) compiled 289 surveys of deer tick activity produced by public health departments and

339 researchers primarily in the northeast and Midwest United States and subjected each set of observations  
340 to the broken\_window algorithm. They found none of the survey data reached stability time in less than 5  
341 years, indicating that shorter term studies may be insufficient to infer long term population dynamics.  
342 Bruel and White (2021) used a similar approach to investigate the optimal sampling of sediment cores for  
343 constructing phytoplankton communities. However, they examined the sampling effort required to detect  
344 abrupt shifts (i.e., changepoints) in community structure, as opposed to simple linear trends over time.  
345 This work highlights the need for future studies investigating the sampling required to detect patterns  
346 beyond those from simple linear regression. Other related work has focused on estimating the length of  
347 time series required to achieve high statistical power (White, 2019), and studying data-poor fisheries  
348 (White & Bahlai, 2020): taken together, these tools will enable previous work to be mined to understand  
349 the characteristics of trends common to those systems, and enable future studies to be designed to  
350 maximize information value.

351         The broken\_window algorithm uses the longest available study duration as a proxy for 'truth' as  
352 its core assumption. However, long-term studies themselves are not immune to uncovering misleading  
353 trends. Methodology, site selection, and periods of disturbance following the initiation of a long-term study  
354 may inherently bias the apparent trajectory of a system (Fournier et al., 2019). This highlights the  
355 importance not just of study duration, but of the selection of study starting and ending points: capturing an  
356 outlying data point or a high or low in a system's natural variability near the beginning or end of the study  
357 period will be highly influential on the statistical outcome, and thus the conclusions reached (Chatterjee &  
358 Hadi, 1986; Fournier et al., 2019). Understanding and characterizing these highly influential observations  
359 in the analysis process is essential to our interpretations of these ecological trajectories. Thus, it is  
360 important to consider these biasing factors when using long-term data in algorithms like the one  
361 presented herein: any statistical method is likely to be influenced by outlying or unlikely observations.

362         The broken\_window algorithm uses a linear model as its underlying structure, which is the  
363 simplest case of a relationship a response variable might take with time. However, many ecological  
364 processes are not linear with time and may be better described with non-linear approaches (Bahlai &  
365 Zipkin, 2020; Knape, 2016; Wauchope et al., 2019). In the initial deployment of this algorithm, we created  
366 a tool for the simplest case that would be applicable under a wide variety of circumstances, but future  
367 iterations should consider multiple underlying model structures, as well as contingencies for unevenly  
368 spaced observations or missing data.

## 369 **6 Conclusions**

370         The ever-increasing availability of long-term data, fostered by the growth of technology that  
371 enables automated collection and sharing of data products, and the infrastructure availability and  
372 'maturity' of projects like the US (and international) Long Term Ecological Research networks (Brunt et  
373 al., 2002) and more recently, the National Ecological Observatory Network (SanClements et al., 2020;  
374 Schimel et al., 2007) present several key opportunities for new understanding of temporal processes in

375 ecology. Not only can these data be used to observe long-term processes in their respective systems,  
376 these data can be used to contextualize the vast amount of data produced by shorter-term studies in our  
377 field. Ecology, until relatively recently, was a field defined by data scarcity: studies took place at local  
378 scales, over time periods manageable to small groups of researchers, and these shorter-term studies  
379 remain the most common output in ecological research (Peters, 2010). Their work represents a huge  
380 human undertaking, however, and it is critical that we are able to interpret the insights these observations  
381 provide appropriately.

382

383 The broken\_window algorithm provides a framework for understanding how ecological data  
384 produced by different domains behaves at different temporal scales. Thus, this tool can be used to  
385 synthesize data describing ecological processes, specifically examining how system properties (such as  
386 landscape, site, seasonality, lifespan in the case of organisms, management regimes, cycles in  
387 population trends) affect the likelihood of a spurious trend being observed. In future work, we will examine  
388 data of differing structures to identify the characteristics of observation periods that are more likely to  
389 produce misleading results, and conversely, the characteristics of time periods that are consistent with  
390 longer system trends. This framework will support ongoing research efforts to separate trends in  
391 ecological systems from natural variability, human biases and research-specific influences and underlying  
392 processes, and provide critical insight into the scaling to temporal processes between short- and long-  
393 term experimental designs.

394

## 395 **Acknowledgements**

396 Data used in our firefly case study was collected on traditional Anishinaabe land where Hickory  
397 Corners, Michigan is currently located. The broken\_window algorithm was initially inspired by  
398 conversations with John Andrew Gerrath, Ilya Gelfand, and Doug Landis and through feedback and  
399 refinements from G. Phillip Robertson, Scott Swinton, Elise Zipkin, Nick Haddad, and the rest of our  
400 colleagues at Kellogg Biological Station. Additionally, the algorithm has incorporated feedback from  
401 colleagues from the United States Long Term Ecological Research network throughout its development.  
402 A particular thanks to Sven Bohm for database curation. Infrastructure supporting this work was funded  
403 by the National Science Foundation Long-term Ecological Research Program (DEB 1832042) at the  
404 Kellogg Biological Station; the algorithm was developed with funding from the National Science  
405 Foundation Directorate for Computer and Information Science and Engineering (OAC 1838807) to CB, JP  
406 and KSW and was completed with the support of a grant from the National Science Foundation  
407 Directorate for Biological Infrastructure (IIBR 2045721) to CB.

408           **References**

- 409   Bahlai, C. A., & Zipkin, E. F. (2020). The Dynamic Shift Detector: An algorithm to identify  
410           changes in parameter values governing populations. *PLOS Computational Biology*,  
411           16(1), e1007542. <https://doi.org/10.1371/journal.pcbi.1007542>
- 412   Birkhead, T. (2014). Stormy outlook for long-term ecology studies. *Nature News*, 514(7523),  
413           405.
- 414   Brown, P. M. J., Frost, R., Doberski, J., Sparks, T. I. M., Harrington, R., & Roy, H. E. (2011).  
415           Decline in native ladybirds in response to the arrival of *Harmonia axyridis*: Early  
416           evidence from England. *Ecological Entomology*, 36(2), 231–240.  
417           <https://doi.org/10.1111/j.1365-2311.2011.01264.x>
- 418   Bruel, R., & White, E. R. (2021). Sampling requirements and approaches to detect ecosystem  
419           shifts. *Ecological Indicators*, 121, 107096. <https://doi.org/10.1016/j.ecolind.2020.107096>
- 420   Brunt, J. W., McCartney, P., Baker, K., & Stafford, S. G. (2002). The future of ecoinformatics in  
421           long term ecological research. *Proceedings of the 6th World Multiconference on*  
422           *Systemics, Cybernetics and Informatics: SCI*, 14–18.
- 423   Carey, C. C., & Cottingham, K. L. (2016). Cross-scale Perspectives: Integrating Long-term and  
424           High-frequency Data into Our Understanding of Communities and Ecosystems. *The*  
425           *Bulletin of the Ecological Society of America*, 97(1), 129–132.  
426           <https://doi.org/10.1002/bes2.1205>
- 427   Chatterjee, S., & Hadi, A. S. (1986). Influential Observations, High Leverage Points, and  
428           Outliers in Linear Regression. *Statist. Sci.*, 1(3), 379–393.  
429           <https://doi.org/10.1214/ss/1177013622>
- 430   Chave, J. (2013). The problem of pattern and scale in ecology: What have we learned in  
431           20 years? *Ecology Letters*, 16(s1), 4–16. <https://doi.org/10.1111/ele.12048>

- 432 Chow, A. T., Chong, J.-H., Cook, M., & White, D. (2014). Vanishing Fireflies: A Citizen-Science  
433 Project Promoting Scientific Inquiry and Environmental Stewardship. *Science Education*  
434 *and Civic Engagement*, 6(1), 23–31.
- 435 Christie, R., Whitney, K. S., Perrone, J., & Bahlai, C. A. (2021). Longer study length,  
436 standardized sampling techniques, and broader geographic scope leads to higher  
437 likelihood of detecting stable abundance patterns in long term deer tick (*Ixodes*  
438 *scapularis*) studies. *BioRxiv*, 2021.03.06.434217.  
439 <https://doi.org/10.1101/2021.03.06.434217>
- 440 Cusser, S., Bahlai, C., Swinton, S. M., Robertson, G. P., & Haddad, N. M. (2020). Long-term  
441 research avoids spurious and misleading trends in sustainability attributes of no-till.  
442 *Global Change Biology*, 26(6), 3715–3725. <https://doi.org/10.1111/gcb.15080>
- 443 Cusser, S., Helms IV, J., Bahlai, C. A., & Haddad, N. M. (2021). How long do population level  
444 field experiments need to be? Utilising data from the 40-year-old LTER network. *Ecology*  
445 *Letters*, n/a(n/a). <https://doi.org/10.1111/ele.13710>
- 446 Daskalova, G. N., Phillimore, A. B., & Myers-Smith, I. H. (2021). Accounting for year effects and  
447 sampling error in temporal analyses of invertebrate population and biodiversity change:  
448 A comment on Seibold et al. 2019. *Insect Conservation and Diversity*, 14(1), 149–154.  
449 <https://doi.org/10.1111/icad.12468>
- 450 Didham, R. K., Basset, Y., Collins, C. M., Leather, S. R., Littlewood, N. A., Menz, M. H. M.,  
451 Müller, J., Packer, L., Saunders, M. E., Schönrogge, K., Stewart, A. J. A., Yanoviak, S.  
452 P., & Hassall, C. (2020). Interpreting insect declines: Seven challenges and a way  
453 forward. *Insect Conservation and Diversity*, 13(2), 103–114.  
454 <https://doi.org/10.1111/icad.12408>
- 455 Esling, P., & Agon, C. (2012). Time-series data mining. *ACM Comput. Surv.*, 45(1), 1–34.

- 456 Evans, M. R., Norris, K. J., & Benton, T. G. (2012). Predictive ecology: Systems approaches.  
457 *Philosophical Transactions of the Royal Society of London. Series B, Biological*  
458 *Sciences*, 367(1586), 163–169. PubMed. <https://doi.org/10.1098/rstb.2011.0191>
- 459 Fournier, A. M. V., White, E. R., & Heard, S. B. (2019). Site-selection bias and apparent  
460 population declines in long-term studies. *Conservation Biology*, 33(6), 1370–1379.  
461 <https://doi.org/10.1111/cobi.13371>
- 462 Franklin, J. F., Bledsoe, C. S., & Callahan, J. T. (1990). Contributions of the Long-Term  
463 Ecological Research Program. *Bioscience*, 40(7), 509–523.
- 464 Grames, E., Montgomery, G., Haddaway, N., Dicks, L., Elphick, C., Matson, T., Nakagawa, S.,  
465 Saunders, M., Tingley, M., White, T., Woodcock, P., & Wagner, D. (2019). *Trends in*  
466 *global insect abundance and biodiversity: A community-driven systematic map protocol*.  
467 <https://doi.org/10.17605/OSF.IO/Q63UY>
- 468 Hastings, A. (2004). Transients: The key to long-term ecological understanding? *Trends in*  
469 *Ecology & Evolution*, 19(1), 39–45. <https://doi.org/10.1016/j.tree.2003.09.007>
- 470 Hermann, S. L., Xue, S., Rowe, L., Davidson-Lowe, E., Myers, A., Eshchanov, B., & Bahlai, C.  
471 A. (2016). Thermally moderated firefly activity is delayed by precipitation extremes.  
472 *Royal Society Open Science*, 3(12), 160712.
- 473 Higgins, K., Hastings, A., Sarvela, J. N., & Botsford, L. W. (1997). Stochastic Dynamics and  
474 Deterministic Skeletons: Population Behavior of Dungeness Crab. *Science*, 276(5317),  
475 1431. <https://doi.org/10.1126/science.276.5317.1431>
- 476 Hughes, B. B., Beas-Luna, R., Barner, A. K., Brewitt, K., Brumbaugh, D. R., Cerny-Chipman, E.  
477 B., Close, S. L., Coblenz, K. E., de Nesnera, K. L., Drobitch, S. T., Figurski, J. D.,  
478 Focht, B., Friedman, M., Freiwald, J., Heady, K. K., Heady, W. N., Hettinger, A.,  
479 Johnson, A., Karr, K. A., ... Carr, M. H. (2017). Long-Term Studies Contribute  
480 Disproportionately to Ecology and Policy. *BioScience*, 67(3), 271–281.  
481 <https://doi.org/10.1093/biosci/biw185>

- 482 Jarvis, M. F., & Williams, M. (2016). Irreproducibility in Preclinical Biomedical Research:  
483 Perceptions, Uncertainties, and Knowledge Gaps. *Trends in Pharmacological Sciences*,  
484 37(4), 290–302. <https://doi.org/10.1016/j.tips.2015.12.001>
- 485 Knape, J. (2016). Decomposing trends in Swedish bird populations using generalized additive  
486 mixed models. *Journal of Applied Ecology*, 53(6), 1852–1861.  
487 <https://doi.org/10.1111/1365-2664.12720>
- 488 Knapp, A. K., Smith, M. D., Hobbie, S. E., Collins, S. L., Fahey, T. J., Hansen, G. J. A., Landis,  
489 D. A., La Pierre, K. J., Melillo, J. M., Seastedt, T. R., Shaver, G. R., & Webster, J. R.  
490 (2012). Past, present, and future roles of long-term experiments in the LTER Network.  
491 *Bioscience*, 62(4), 377–389. ProQuest Research Library.  
492 <https://doi.org/10.1029/2008gb003336>
- 493 Levin, S. A. (1992). The Problem of Pattern and Scale in Ecology: The Robert H. MacArthur  
494 Award Lecture. *Ecology*, 73(6), 1943–1967. <https://doi.org/10.2307/1941447>
- 495 Lovett, G. M., Burns, D. A., Driscoll, C. T., Jenkins, J. C., Mitchell, M. J., Rustad, L., Shanley, J.  
496 B., Likens, G. E., & Haeuber, R. (2007). Who needs environmental monitoring? *Frontiers*  
497 *in Ecology and the Environment*, 5(5), 253–260.
- 498 Magurran, A. E., Baillie, S. R., Buckland, S. T., Dick, J. McP., Elston, D. A., Scott, E. M., Smith,  
499 R. I., Somerfield, P. J., & Watt, A. D. (2010). Long-term datasets in biodiversity research  
500 and monitoring: Assessing change in ecological communities through time. *Special*  
501 *Issue: Long-Term Ecological Research*, 25(10), 574–582.  
502 <https://doi.org/10.1016/j.tree.2010.06.016>
- 503 Nakagawa, S., & Cuthill, I. (2007). Effect size, confidence interval and statistical significance: A  
504 practical guide for biologists. *Biological Reviews*, 82, 591–605.
- 505 Orwig, D. A., Cobb, R. C., D'Amato, A. W., Kizlinski, M. L., & Foster, D. R. (2008). Multi-year  
506 ecosystem response to hemlock woolly adelgid infestation in southern New England  
507 forests. *Canadian Journal of Forest Research*, 38(4), 834–843.



- 508 Peters, D. P. C. (2010). Accessible ecology: Synthesis of the long, deep, and broad. *Trends in*  
509 *Ecology & Evolution*, 25(10), 592–601. <https://doi.org/10.1016/j.tree.2010.07.005>
- 510 Rueda-Cediel, P., Anderson, K. E., Regan, T. J., Franklin, J., & Regan, H. M. (2015). Combined  
511 Influences of Model Choice, Data Quality, and Data Quantity When Estimating  
512 Population Trends. *PLOS ONE*, 10(7), e0132255.  
513 <https://doi.org/10.1371/journal.pone.0132255>
- 514 Sánchez-Bayo, F., & Wyckhuys, K. A. (2019). Worldwide decline of the entomofauna: A review  
515 of its drivers. *Biological Conservation*, 232, 8–27.
- 516 SanClements, M., Lee, R. H., Ayres, E. D., Goodman, K., Jones, M., Durden, D., Thibault, K.,  
517 Zulueta, R., Roberti, J., Lunch, C., & Gallo, A. (2020). Collaborating with NEON.  
518 *BioScience*, 70(2), 107–107. <https://doi.org/10.1093/biosci/biaa005>
- 519 Schimel, D., Hargrove, W., Hoffman, F., & MacMahon, J. (2007). NEON: a hierarchically  
520 designed national ecological network. *Frontiers in Ecology and the Environment*, 5(2),  
521 59–59. [https://doi.org/10.1890/1540-9295\(2007\)5\[59:NAHDNE\]2.0.CO;2](https://doi.org/10.1890/1540-9295(2007)5[59:NAHDNE]2.0.CO;2)
- 522 Schneider, D. C. (2001). The Rise of the Concept of Scale in Ecology: The concept of scale is  
523 evolving from verbal expression to quantitative expression. *BioScience*, 51(7), 545–553.  
524 [https://doi.org/10.1641/0006-3568\(2001\)051\[0545:TROTCO\]2.0.CO;2](https://doi.org/10.1641/0006-3568(2001)051[0545:TROTCO]2.0.CO;2)
- 525 Suding, K. N., & Gross, K. L. (2006). The dynamic nature of ecological systems: Multiple states  
526 and restoration trajectories. *Foundations of Restoration Ecology*, 190–209.
- 527 Sutherland, W. J., Freckleton, R. P., Godfray, H. C. J., Beissinger, S. R., Benton, T., Cameron,  
528 D. D., Carmel, Y., Coomes, D. A., Coulson, T., Emmerson, M. C., Hails, R. S., Hays, G.  
529 C., Hodgson, D. J., Hutchings, M. J., Johnson, D., Jones, J. P. G., Keeling, M. J., Kokko,  
530 H., Kunin, W. E., ... Wiegand, T. (2013). Identification of 100 fundamental ecological  
531 questions. *Journal of Ecology*, 101(1), 58–67. <https://doi.org/10.1111/1365-2745.12025>
- 532 Turchin, P. (2003). *Complex population dynamics: A theoretical/empirical synthesis* (Vol. 35).  
533 Princeton University Press.

- 534 Voelkl, B., & Würbel, H. (2016). Reproducibility Crisis: Are We Ignoring Reaction Norms?  
535 *Trends in Pharmacological Sciences*, 37(7), 509–510.  
536 <https://doi.org/10.1016/j.tips.2016.05.003>
- 537 Wagner, D. L. (2020). Insect declines in the Anthropocene. *Annual Review of Entomology*, 65,  
538 457–480.
- 539 Wagner, M., Heinrich, W., & Jetschke, G. (2006). Seed bank assembly in an unmanaged  
540 ruderal grassland recovering from long-term exposure to industrial emissions. *Acta*  
541 *Oecologica*, 30(3), 342–352. <https://doi.org/10.1016/j.actao.2006.06.002>
- 542 Wauchope, H. S., Amano, T., Sutherland, W. J., & Johnston, A. (2019). When can we trust  
543 population trends? A method for quantifying the effects of sampling interval and duration.  
544 *Methods in Ecology and Evolution*, 10(12), 2067–2078. [https://doi.org/10.1111/2041-](https://doi.org/10.1111/2041-210X.13302)  
545 [210X.13302](https://doi.org/10.1111/2041-210X.13302)
- 546 White, E. R. (2019). Minimum Time Required to Detect Population Trends: The Need for Long-  
547 Term Monitoring Programs. *BioScience*, biy144–biy144.  
548 <https://doi.org/10.1093/biosci/biy144>
- 549 White, E. R., & Bahlai, C. A. (2020). Experimenting with the past to improve environmental  
550 monitoring programs. *Frontiers in Ecology and Evolution*.  
551 <https://doi.org/10.3389/fevo.2020.572979>
- 552 Willis, K. J., & Birks, H. J. B. (2006). What Is Natural? The Need for a Long-Term Perspective in  
553 Biodiversity Conservation. *Science*, 314(5803), 1261.  
554 <https://doi.org/10.1126/science.1122667>
- 555 Wood, C. M., Loman, Z. G., McKinney, S. T., & Loftin, C. S. (2020). Testing prediction accuracy  
556 in short-term ecological studies. *Basic and Applied Ecology*, 43, 77–85.  
557 <https://doi.org/10.1016/j.baae.2020.01.003>
- 558 Yoccoz, N. G. (1991). Use, Overuse, and Misuse of Significance Tests in Evolutionary Biology  
559 and Ecology. *Bulletin of the Ecological Society of America*, 72(2), 106–111.

560

561

## 562 Figures

563

564 **Figure 1: Same data, different observation periods, different conclusions.** Firefly populations  
565 (reported as mean number of adults captured per trap) monitored in ten plant community treatments at  
566 Kellogg Biological Station in southwestern Michigan cycle over an approximately 6 year period (panel A).  
567 Yet, if sampling had only occurred over a 4 year period, we would conclude the population underwent a  
568 steep (and statistically significant) decline in the four years from 2005-2008 (slope  $-0.31 \pm 0.05$ ,  
569  $p=0.000003$ ,  $R^2=0.633$ ; panel B). Data and figures adapted from Hermann et al (2016).

570

571 **Figure 2: Core outputs of the broken\_window algorithm:** Using the firefly data from the early  
572 successional plant community presented in Hermann et al (2016), we are able to compile 55 possible  
573 windows of three years or greater. **A)** The pyramid plot gives a distribution of possible conclusions. On  
574 this plot, each point represents a window and its corresponding summary statistics for a linear  
575 relationship between the response variable (in this case, z-scaled population density of fireflies) and time.  
576 Point coordinates are defined by the slope and length of a window, and point size is scaled by the  $R^2$   
577 computed for that regression. The lines accompanying each point represent standard error of the slope for  
578 each point. Statistically significant relationships (in this case  $\alpha=0.05$ ) are plotted as black circles, and non-  
579 significant slopes are plotted as red Xs. The vertical central dashed black line represents the slope of the  
580 complete time series (here with 12 years of data) and the vertical dotted grey lines are placed at one  
581 standard deviation in both the positive and negative direction from the 'true' slope. **B)** The 'wrongness  
582 plot' visualizes the relationship between the likelihood of a spurious conclusion and statistical proxies for  
583 'confidence' in a relationship. The proportion of windows where spurious slopes were observed by the  
584 length of window are displayed as black circular points with blue solid smoothing line, and the average  
585  $R^2$  value across windows of that length are given as orange triangular points with a dashed red  
586 smoothing line. The grey dotted vertical line is placed at the 'stability time' of 7 years, after which the  
587 slopes in 95% of the windows occur within one standard deviation of the 'true' slope.

588

589

590 **Figure 3: The broken stick plot allows a user to visualize the magnitude of difference between the**  
591 **slopes produced at different window lengths.** Using the firefly data from the early successional plant  
592 community from Hermann et al (2016), all of the nine panels presents the Z-scaled response of firefly  
593 density over time, and a solid black line indicates the linear regression of the full data series (the 'true'  
594 slope). The 95% confidence interval of this line is plotted in light blue. Within each panel, the linear  
595 regressions for each window of a given length are plotted: regressions with a statistically significant slope  
596 (at  $\alpha=0.05$ ) are given with red dashed lines, and non-significant regressions are plotted as grey dotted  
597 lines.

598

Adults per trap

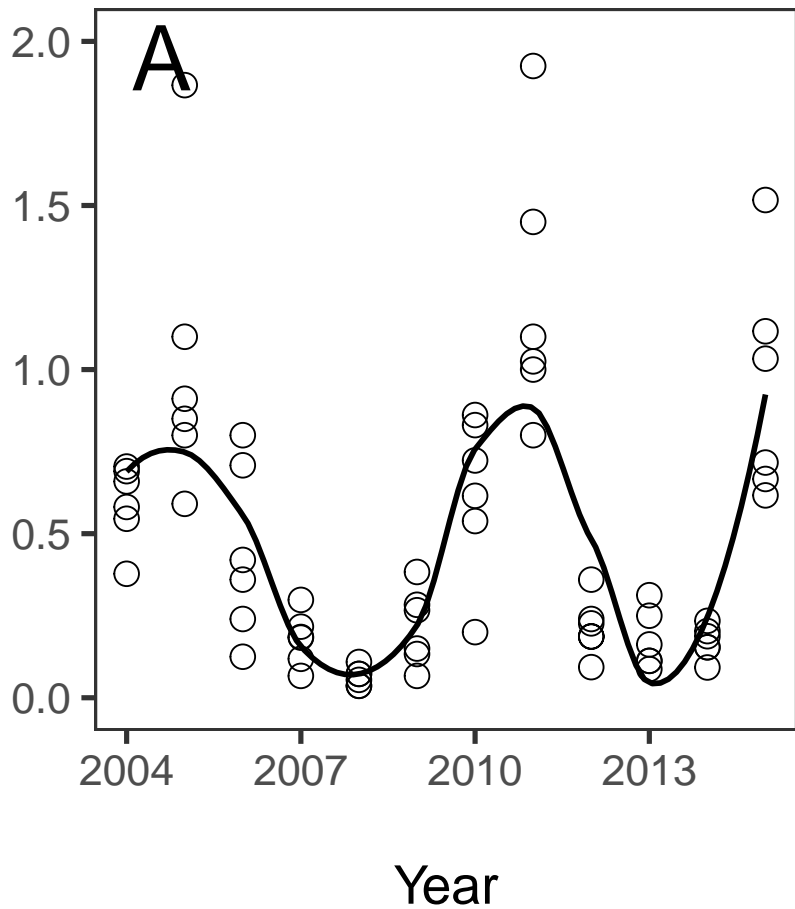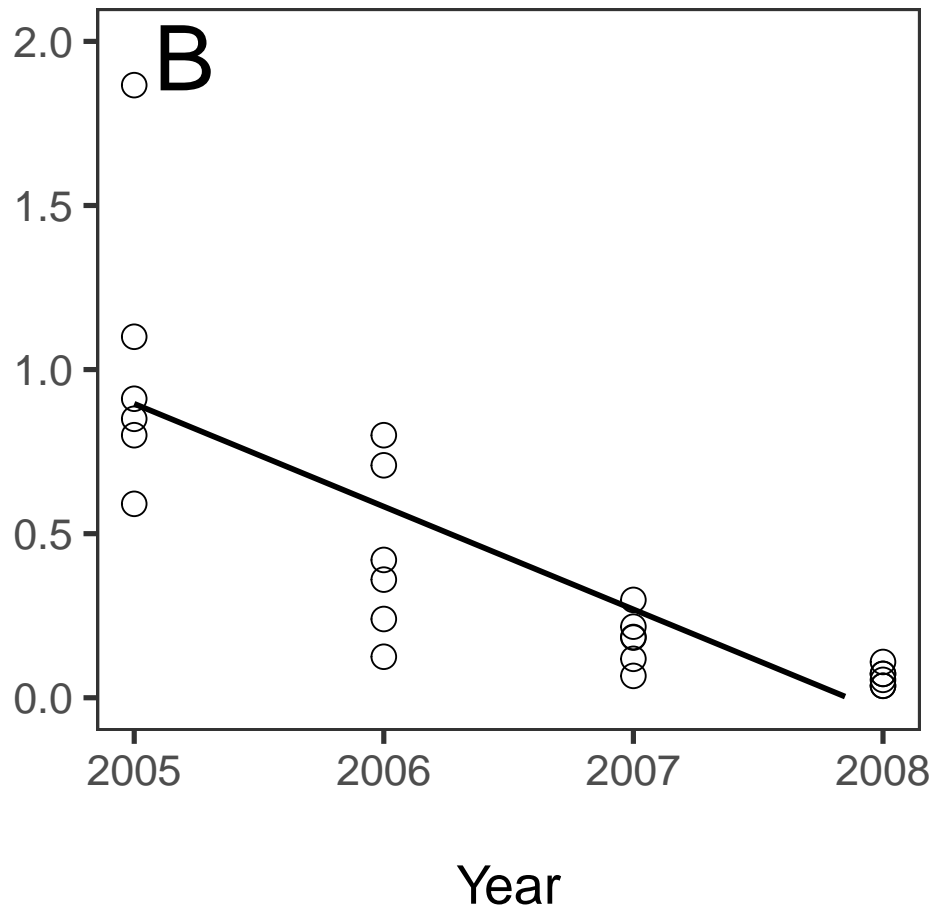

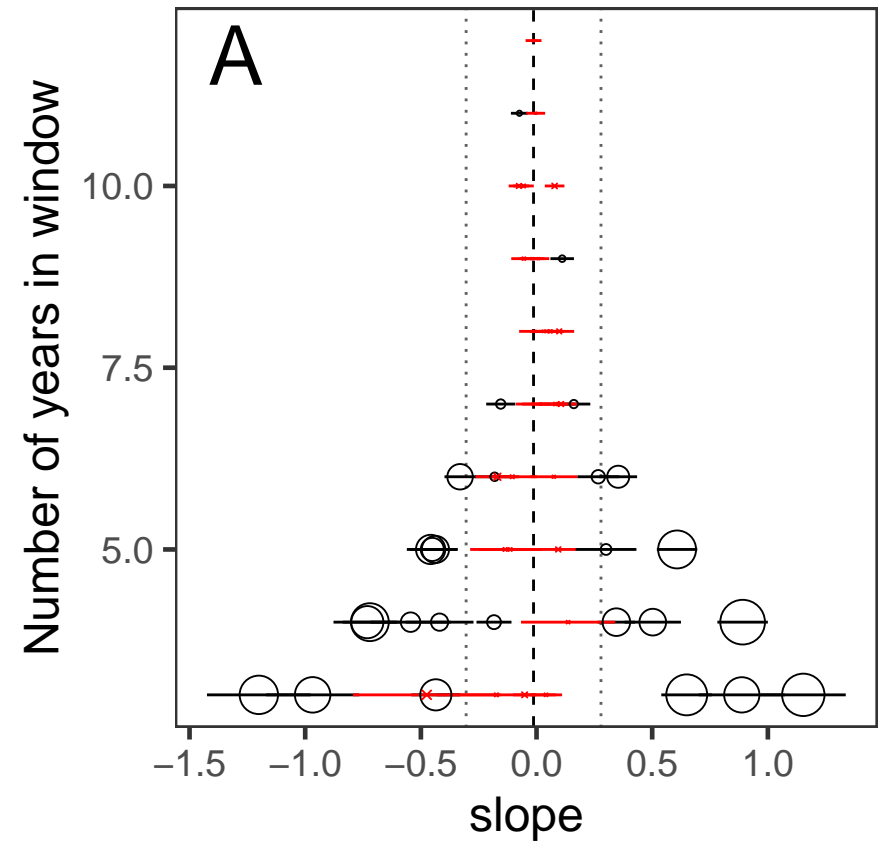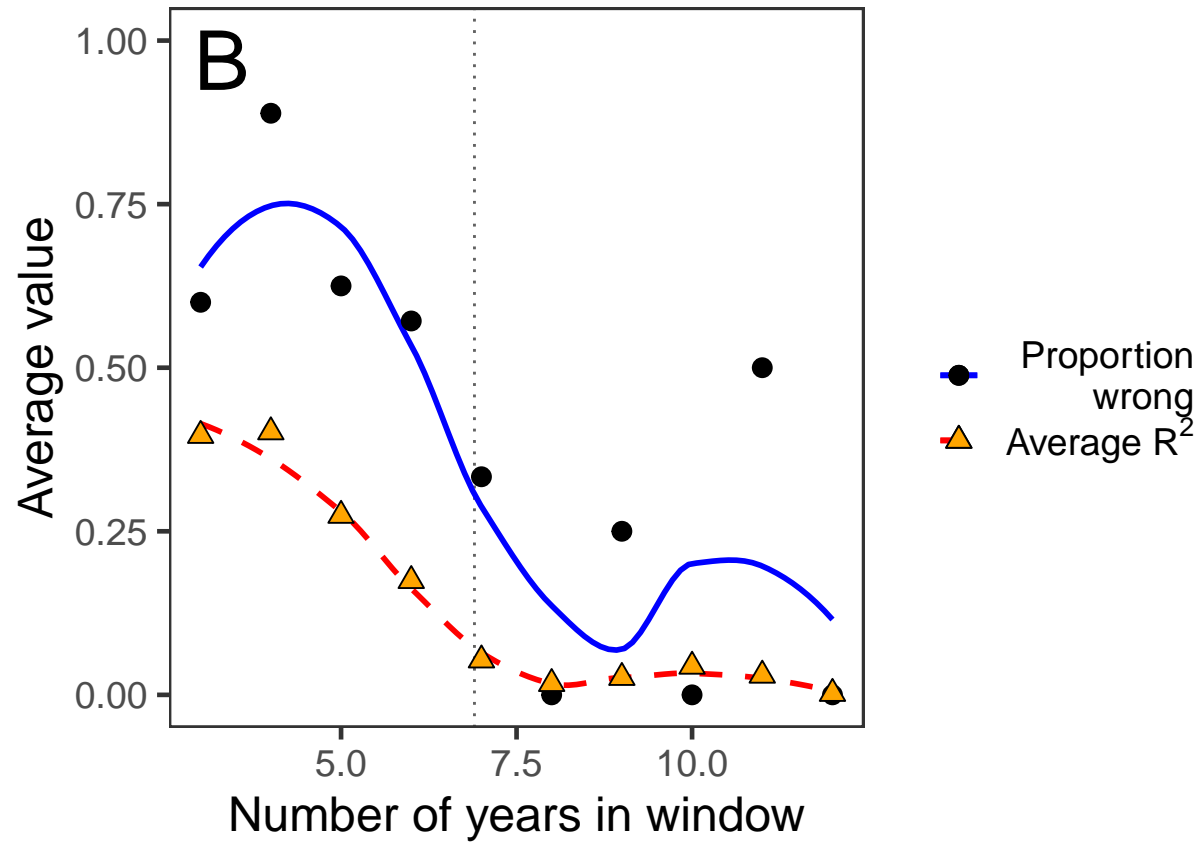

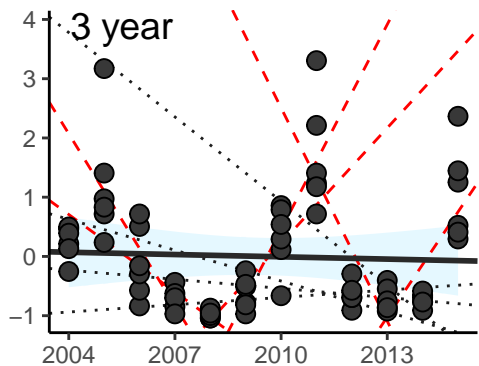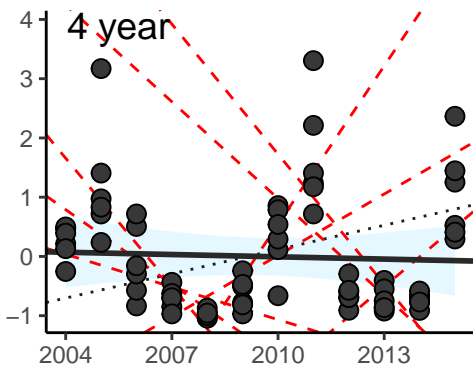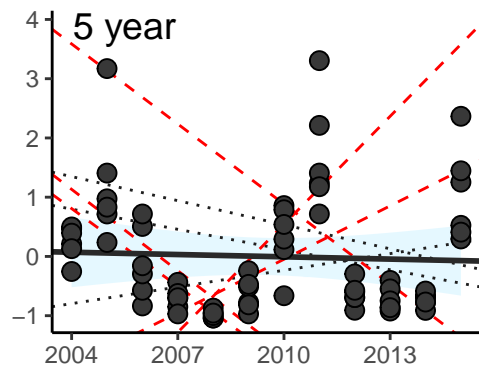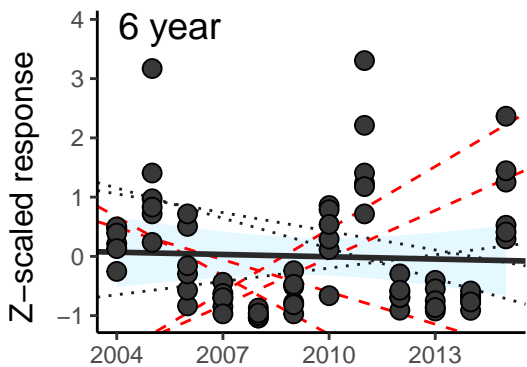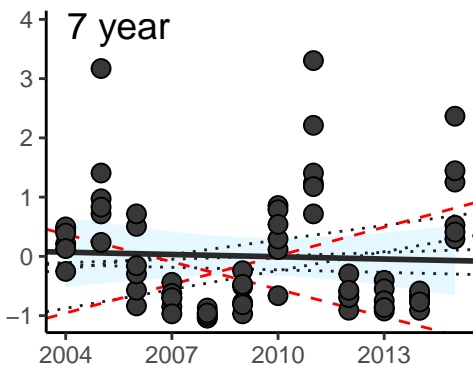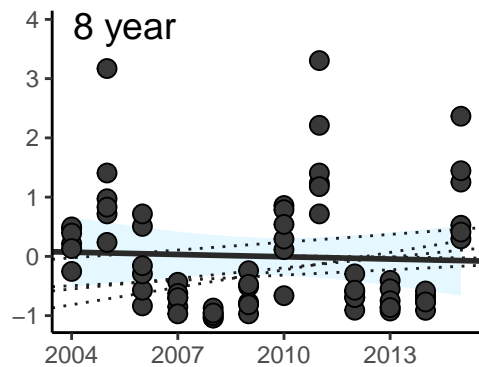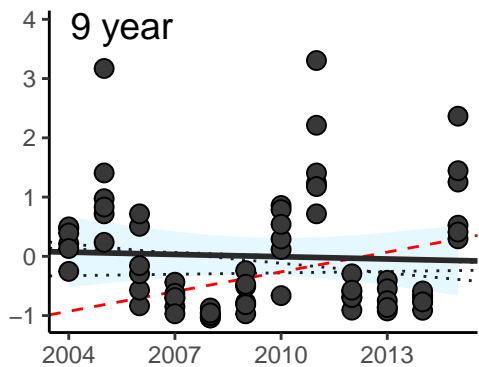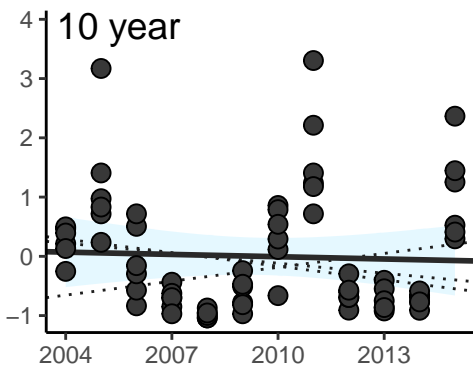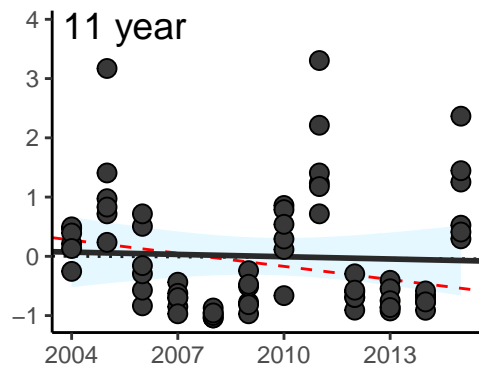

Year
